# Supplementary material
Source: ML conference proceedings conference paper supplement (https://aclanthology.org/D19-1423)
Supplement: Attachment [file supplement.pdf › supplement.pdf]

## **B Adversarial examples**

In this additional supplementary material, we show randomly chosen adversarial examples found by the genetic attack. We show examples for three different models: the CNN model on IMDB trained normally, with certifiably robust training, and with data augmentation. For each model, we picked ten random development set examples for which the model was correct on the original example, but wrong after the genetic attack. Changed words are marked in bold.

Normally trained model, example 1

Original: The original is a relaxing watch , with some truly memorable animated sequences . Unfortunately , the sequel , while not the worst of the DTV sequels completely lacks the sparkle . The **biggest** letdown is a lack of a story . Like Belle 's Magical World , the characters are told through a series of vignettes . Magical World , while marginally **better** , still manages to make a mess of the story . In between the vignettes , we see the mice at work , and I personally think the antics of Jaq and Gus are the redeeming merits of this movie . The first vignette is the **best** , about Cinderella getting used to being to being a princess . This is the best , because the mice were at their funniest here . The **worst** of the vignettes , when Jaq turns into a human , is cute at times , but **has** a lack of imagination . The last vignette , when Anastasia falls in love , was also cute . The problem was , I could n't imagine Anastasia being friendly with Cinderella , as I considered her the meaner out of the stepsisters . This was also **marred** by a rather ridiculous subplot about Lucifer falling in love with PomPom . The incidental music was very pleasant to listen to ; however I hated the songs , they were really uninspired , and nothing like the beautiful Tchaikovsky inspired melodies of the original . The characters were the strongest development here . Cinderella while still caring , had lost her sincerity , and a lot of her charm from the original , though she does wear some very pretty clothes . The Duke had some truly funny moments but they were n't enough to save the **film** , likewise with Prudence and the king . As I mentioned , the mice were the redeeming merits of the movie , as they alone contributed to the film 's cuteness . I have to say also the animation is colourful and above average , and the voice acting was surprisingly good . All in all , a cute , if unoriginal sequel , that was **marred** by the songs and a lack of a story . 4/10 for the mice , the **voice** acting , the animation and some pretty dresses . Bethany Cox

Perturbed: The original is a relaxing watch , with some truly memorable animated sequences . Unfortunately , the sequel , while not the worst of the DTV sequels completely lacks the sparkle . The **greatest** letdown is a lack of a story . Like Belle 's Magical World , the characters are told through a series of vignettes . Magical World , while marginally **nicer** , still manages to make a mess of the story . In between the vignettes , we see the mice at work , and I personally think the antics of Jaq and Gus are the redeeming merits of this movie . The first vignette is the **finest** , about Cinderella getting used to being to being a princess . This is the best , because the mice were at their funniest here . The **toughest** of the vignettes , when Jaq turns into a human , is cute at times , but **possesses** a lack of imagination . The last vignette , when Anastasia falls in love , was also cute . The problem was , I could n't imagine Anastasia being friendly with Cinderella , as I considered her the meaner out of the stepsisters . This was also **tempered** by a rather ridiculous subplot about Lucifer falling in love with PomPom . The incidental music was very pleasant to listen to ; however I hated the songs , they were really uninspired , and nothing like the beautiful Tchaikovsky inspired melodies of the original . The characters were the strongest development here . Cinderella while still caring , had lost her sincerity , and a lot of her charm from the original , though she does wear some very pretty clothes . The Duke had some truly funny moments but they were n't enough to save the **cinema** , likewise with Prudence and the king . As I mentioned , the mice were the redeeming merits of the movie , as they alone contributed to the film 's cuteness . I have to say also the animation is colourful and above average , and the voice acting was surprisingly good . All in all , a cute , if unoriginal sequel , that was **tempered** by the songs and a lack of a story . 4/10 for the mice , the **voices** acting , the animation and some pretty dresses . Bethany Cox

Correct label: negative.

Model confidence on original example: 90.3.

### Normally trained model, example 2

Original: When I was younger , I liked this show , but now ... BLECCH ! ! ! This show is sappy , **badly** written , and rarely **funny** . The three leads **were** all good actors and **funny** men ( Saget 's stand up was a lot better than the stuff this show came up with , as was Coulier a better **stand** up , and Stamos was a better than average actor ) . After a while , Stamos wanted off the show because it wanted to do more serious stuff ( who could blame him ? ) . The show eventually got cancelled when many of the actors demanded more money . Here are a few things that drive me crazy about the show : 1 . The **catch** phrases- How many times can one person put up with tiring **catch** phrases like with 'how rude ' , 'you got it **dude** ' , 'nerdbomber ' , 'cut it out ' and 'have mercy ' in a 24 hour time period ? 2 . Kimmy Gibler- the most **annoying** character ever written for television . 3 . The writing- **stale** and cliched as an oreo **cookie** . There is good **cliched** writing and **bad cliched** writing . Full House had **bad** cliched writing . 4 . Three men living together in San Francisco- Enough said . 5 . Unrealistic stuff- Too much to recall . 6 . Trendy kids- The **girls** had all the **latest** mall fashions and you can see posters of trendy recording **artists** they would be into . Now this show is on Nick @ Nite . I would hardly call it a classic . I have nothing bad to say about the people involved since I think many of them are **talented** in their own right . But this show was just so sugary sweet , I could n't stand it after a while .

Perturbed: When I was younger , I liked this show , but now ... BLECCH ! ! ! This show is sappy , **desperately** written , and rarely **hilarious** . The three leads **was** all good actors and **hilarious** men ( Saget 's stand up was a lot better than the stuff this show came up with , as was Coulier a better **stands** up , and Stamos was a better than average actor ) . After a while , Stamos wanted off the show because it wanted to do more serious stuff ( who could blame him ? ) . The show eventually got cancelled when many of the actors demanded more money . Here are a few things that drive me crazy about the show : 1 . The **captures** phrases- How many times can one person put up with tiring **captures** phrases like with 'how rude ' , 'you got it **bro** ' , 'nerdbomber ' , 'cut it out ' and 'have mercy ' in a 24 hour time period ? 2 . Kimmy Gibler- the most **exasperating** character ever written for television . 3 . The writing- **obsolete** and cliched as an oreo **cookies** . There is good **corny** writing and **wicked corny** writing . Full House had **wicked** cliched writing . 4 . Three men living together in San Francisco- Enough said . 5 . Unrealistic stuff- Too much to recall . 6 . Trendy kids- The **daughters** had all the **last** mall fashions and you can see posters of trendy recording **artistes** they would be into . Now this show is on Nick @ Nite . I would hardly call it a classic . I have nothing bad to say about the people involved since I think many of them are **genius** in their own right . But this show was just so sugary sweet , I could n't stand it after a while .

Correct label: negative.

Model confidence on original example: 98.9.

### Normally trained model, example 3

Original: Jim Carrey **shines** in this **beautiful** movie . This is **now** one of my **favorite** movies . I read all about the making and I **thought** it was **incredible** how the **did** it . I **ca** n't wait **till** this comes out on DVD . I **saw** this in **theaters** so many **times** , I **ca** n't even count how **times** I 've **seen** it .

Perturbed: Jim Carrey **stars** in this **handsome** movie . This is **currently** one of my **favourite** movies . I read all about the making and I **figured** it was **unthinkable** how the **am** it . I **could** n't wait **unless** this comes out on DVD . I **watched** this in **theatres** too many **time** , I **could** n't even count how **period** I 've **watched** it .

Correct label: positive.

Model confidence on original example: 100.0.

#### Normally trained model, example 4

Original: Did anyone read the script . This has to be some of the **worst** writing and directing of the entire year . Three great **actors** , Paul Giamatti , Rachel Weisz and Miranda Richardson could n't pull this one out . About two-thirds it looked like Giamatti eyes were **saying** , I ca n't believe I signed the contract . It 's not the **worst** movie I ever saw , but it 's on the **really** really **bad** Christmas movie list . Not enough lines , but what else can be said ? Okay , the movie just does n't move with Vaughn 's con-man dialogue , his character is just a **creepy** **guy** that you **just** ca n't get **past** . It was just a **lackluster** walk **through** , that no one seemed to be able to get into .

Perturbed: Did anyone read the script . This has to be some of the **toughest** writing and directing of the entire year . Three great **protagonists** , Paul Giamatti , Rachel Weisz and Miranda Richardson could n't pull this one out . About two-thirds it looked like Giamatti eyes were **telling** , I ca n't believe I signed the contract . It 's not the **toughest** movie I ever saw , but it 's on the **truly** really **wicked** Christmas movie list . Not enough lines , but what else can be said ? Okay , the movie just does n't move with Vaughn 's con-man dialogue , his character is just a **terrifying** **buddy** that you **only** ca n't get **last** . It was just a **puny** walk **throughout** , that no one seemed to be able to get into .

Correct label: negative.

Model confidence on original example: 100.0.

#### Normally trained model, example 5

Original: Yes I have rated this film as one star **awful** . Yet , it will be in my rotation of Christmas **movies** henceforth . This truly is so bad it 's good . This is another K.Gordon Murray **production** ( read : buys a really cheap/bad Mexican movie , spends **zero** money getting it dubbed into English and releases it at kiddie matines in the mid 1960 's . ) It 's a shame I stumbled on this so late in life as I 'm sure some " mood enhancers " would make this an even better experience . I 'm not going to rehash what so many of the other reviewers have already said , a Christmas movie with Merlin , the Devil , mechanical wind-up reindeer and some of the most **pathetic** child actors I have ever seen bar none . I plan on running this over the holidays back to back with Kelsey Grammar 's " A Christmas Carol " . Truly a **holiday** experience made in Hell . Now if I can only find " To All A Goodnight ( aka Slayride ) " on DVD I 'll have a triple feature that ca n't be beat . You have to **see** this movie . It moves so slowly that I defy you not to touch the fast forward button-especially on the two dance routines ! This thing reeks like an expensive bleu cheese-guess you have to get past the **stink** to enjoy the experience . Feliz Navidad amigos !

Perturbed: Yes I have rated this film as one star **horrifying** . Yet , it will be in my rotation of Christmas **cinema** henceforth . This truly is so bad it 's good . This is another K.Gordon Murray **producing** ( read : buys a really cheap/bad Mexican movie , spends **nought** money getting it dubbed into English and releases it at kiddie matines in the mid 1960 's . ) It 's a shame I stumbled on this so late in life as I 'm sure some " mood enhancers " would make this an even better experience . I 'm not going to rehash what so many of the other reviewers have already said , a Christmas movie with Merlin , the Devil , mechanical wind-up reindeer and some of the most **lamentable** child actors I have ever seen bar none . I plan on running this over the holidays back to back with Kelsey Grammar 's " A Christmas Carol " . Truly a **festive** experience made in Hell . Now if I can only find " To All A Goodnight ( aka Slayride ) " on DVD I 'll have a triple feature that ca n't be beat . You have to **admire** this movie . It moves so slowly that I defy you not to touch the fast forward button-especially on the two dance routines ! This thing reeks like an expensive bleu cheese-guess you have to get past the **scent** to enjoy the experience . Feliz Navidad amigos !

Correct label: negative.

Model confidence on original example: 97.0.

Normally trained model, example 6

Original: This show is quick-witted , **colorful** , **dark** yet fun , hip and **still** somehow clean . The cast , including an awesome rotation of special **guests** ( i.e . Molly Shannon , Paul Rubens , The-Stapler-Guy-From-Office-Space ) is **electric** . It 's got murder , romance , **family** , AND zombies without ever coming off as cartoony ... Somehow . You really connect with these characters . The whole production is an unlikely **magic** act that left me , something of a skeptic if I do say so myself , totally engrossed and **coming** back for more every Wednesday night . I **just** re-read this and it sounds a little like somebody paid me to write it . It really is that good . I just heard a **rumor** that it was being canceled so I **thought** I 'd send off a flare of good **will** . This is one of those shows that goes under the radar because the network suits ca n't figure out how to make it sexy and sell cars with it . Do yourself a huge favor , if you have n't already , and enjoy this gem while it lasts . OK so one more thing . This show is clever . What that means is that every armchair critic/ " writer " in Hollywood is gon na insert a stick up their youknowwhat before they sit down to watch it , defending themselves with an " I could 've written that " **type** speech to absolutely nobody in their lonely renovated Hollywood hotel room . In other words : the internet . This is a general interest/anonymous website . Before you give your Wednesday TV hour to Dirty Sexy Money or Next Hot Model reruns or whatever other out and out tripe these internet " critics " are n't commenting on , **give** my fave ' show a spin . It 's fun . Good , unpretentious fun .

Perturbed: This show is quick-witted , **colored** , **darkened** yet fun , hip and **even** somehow clean . The cast , including an awesome rotation of special **guest** ( i.e . Molly Shannon , Paul Rubens , The-Stapler-Guy-From-Office-Space ) is **electricity** . It 's got murder , romance , **relatives** , AND zombies without ever coming off as cartoony ... Somehow . You really connect with these characters . The whole production is an unlikely **hallucinogenic** act that left me , something of a skeptic if I do say so myself , totally engrossed and **come** back for more every Wednesday night . I **merely** re-read this and it sounds a little like somebody paid me to write it . It really is that good . I just heard a **rumour** that it was being canceled so I **figured** I 'd send off a flare of good **willpower** . This is one of those shows that goes under the radar because the network suits ca n't figure out how to make it sexy and sell cars with it . Do yourself a huge favor , if you have n't already , and enjoy this gem while it lasts . OK so one more thing . This show is clever . What that means is that every armchair critic/ " writer " in Hollywood is gon na insert a stick up their youknowwhat before they sit down to watch it , defending themselves with an " I could 've written that " **typing** speech to absolutely nobody in their lonely renovated Hollywood hotel room . In other words : the internet . This is a general interest/anonymous website . Before you give your Wednesday TV hour to Dirty Sexy Money or Next Hot Model reruns or whatever other out and out tripe these internet " critics " are n't commenting on , **lend** my fave ' show a spin . It 's fun . Good , unpretentious fun .

Correct label: positive.

Model confidence on original example: 93.7.

Normally trained model, example 7

Original: This was a hit in the South By Southwest ( SXSW ) Film festival in Austin last year , and features a fine **cast** headed up by E.R . 's Gloria Reuben , and a scenery-chewing John Glover . Though **shot** on a **small** budget in NYC , the film looks and **sounds** fabulous , and takes us on a behind the scenes whirl through the **rehearsal** and mounting of what **actors** call “ The Scottish Play , ” as a reference to the word “ Macbeth ” is **thought** to bring on the **play** 's **ancient** curse . The acting company exhibits all the **emotions** of the play **itself** , lust , jealousy , rage , suspicion , and a bit of fun as well . The **games begin** when an accomplished actor is replaced ( in the lead role ) by a well-known “ pretty face ” from the TV soap opera scene in order to draw bigger crowds . The green-eyed monster takes over from there , and the **drama** unfolds **nicely** . Fine soundtrack , and good performances all around . The DVD **includes** director 's **commentary** and some deleted scenes as **well** .

Perturbed: This was a hit in the South By Southwest ( SXSW ) Film festival in Austin last year , and features a fine **casting** headed up by E.R . 's Gloria Reuben , and a scenery-chewing John Glover . Though **murdered** on a **tiny** budget in NYC , the film looks and **sound** fabulous , and takes us on a behind the scenes whirl through the **repeating** and mounting of what **actresses** call “ The Scottish Play , ” as a reference to the word “ Macbeth ” is **thinking** to bring on the **toy** 's **old** curse . The acting company exhibits all the **thrills** of the play **yourselves** , lust , jealousy , rage , suspicion , and a bit of fun as well . The **play starts** when an accomplished actor is replaced ( in the lead role ) by a well-known “ pretty face ” from the TV soap opera scene in order to draw bigger crowds . The green-eyed monster takes over from there , and the **theatre** unfolds **politely** . Fine soundtrack , and good performances all around . The DVD **contains** director 's **remark** and some deleted scenes as **good** .

Correct label: positive.

Model confidence on original example: 97.8.

Normally trained model, example 8

Original: As a young black/latina woman I am always **searching** for movies that represent the experiences and lives of people like me . Of course when I saw this movie at the video store I thought I would enjoy it ; unfortunately , I did n't . Although the **topics** presented in the film are interesting and relevant , the story was simply not properly developed . The movie just kept dragging on and on and many of the characters that appear on screen just come and go without much to contribute to the overall film . Had the director done a better job interconnecting the scenes , perhaps I would have enjoyed it a bit more . Honestly , I would recommend a film like “ Raising Victor ” **over** this one any day . I just was not too impressed .

Perturbed: As a young black/latina woman I am always **browsing** for movies that represent the experiences and lives of people like me . Of course when I saw this movie at the video store I thought I would enjoy it ; unfortunately , I did n't . Although the **themes** presented in the film are interesting and relevant , the story was simply not properly developed . The movie just kept dragging on and on and many of the characters that appear on screen just come and go without much to contribute to the overall film . Had the director done a better job interconnecting the scenes , perhaps I would have enjoyed it a bit more . Honestly , I would recommend a film like “ Raising Victor ” **finished** this one any day . I just was not too impressed .

Correct label: negative.

Model confidence on original example: 65.4.

### Normally trained model, example 9

Original: If Fassbinder has made a worse film , I sure do n't want to see it ! Anyone who complains that his films are too talky and claustrophobic should be forced to view this , to learn to appreciate the more spare style he opted for in excellent films like “ The Bitter Tears Of Petra von Kant ” . This film bogs down with so much arty , quasi-symbolic images it looks like a parody of an “ art-film ” . The scene in the slaughterhouse and the scene where Elvira 's prostitute friend channel-surfs for what seems like ten minutes are just two of the most glaring examples of what makes this film a real test of the viewer 's endurance . But what really angers me about it are the few scenes which feature just Elvira and her ex-wife and/or her daughter . These are the only moments that display any real human emotion , and prove that at the core of this **horrible** film , there was an excellent film struggling to free itself . What a waste .

Perturbed: If Fassbinder has made a worse film , I sure do n't want to see it ! Anyone who complains that his films are too talky and claustrophobic should be forced to view this , to learn to appreciate the more spare style he opted for in excellent films like “ The Bitter Tears Of Petra von Kant ” . This film bogs down with so much arty , quasi-symbolic images it looks like a parody of an “ art-film ” . The scene in the slaughterhouse and the scene where Elvira 's prostitute friend channel-surfs for what seems like ten minutes are just two of the most glaring examples of what makes this film a real test of the viewer 's endurance . But what really angers me about it are the few scenes which feature just Elvira and her ex-wife and/or her daughter . These are the only moments that display any real human emotion , and prove that at the core of this **gruesome** film , there was an excellent film struggling to free itself . What a waste .

Correct label: negative.

Model confidence on original example: 65.8.

### Normally trained model, example 10

Original: This film is the **worst** excuse for a motion picture I have EVER seen . To begin , I 'd **like** to say the the front cover of this film is by all means misleading , if you think you are about to see a truly **scary** horror film with a monster clown , you are soooo wrong . In fact the killers face does n't even slightly resemble the front cover , it 's just an image they must have found on Google and thought it looked **cool** . Speaking of things they **found** and thought it looked cool , there is a scene in this film where some of the gang are searching for the friend in the old woods , then suddenly the screen chops to a scene where there is a mother deer nurturing it 's young in a glisten of sunlight ... I mean **seriously** WTF ? ? ? How is this relevant to the dark woods they are wandering through ? I bought this film from a man at a market hoping it would be entertaining , if it was n't horror then at least it would be funny right ? WRONG ! The next day I GAVE it to my work colleague **ridding** myself from the plague named S.I.C.K Bottom line is : Do n't SEE THIS FILM ! ! !

Perturbed: This film is the **toughest** excuse for a motion picture I have EVER seen . To begin , I 'd **love** to say the the front cover of this film is by all means misleading , if you think you are about to see a truly **terrifying** horror film with a monster clown , you are soooo wrong . In fact the killers face does n't even slightly resemble the front cover , it 's just an image they must have found on Google and thought it looked **groovy** . Speaking of things they **discovered** and thought it looked cool , there is a scene in this film where some of the gang are searching for the friend in the old woods , then suddenly the screen chops to a scene where there is a mother deer nurturing it 's young in a glisten of sunlight ... I mean **deeply** WTF ? ? ? How is this relevant to the dark woods they are wandering through ? I bought this film from a man at a market hoping it would be entertaining , if it was n't horror then at least it would be funny right ? WRONG ! The next day I GAVE it to my work colleague **liberating** myself from the plague named S.I.C.K Bottom line is : Do n't SEE THIS FILM ! ! !

Correct label: negative.

Model confidence on original example: 95.7.

Certifiably robust model, example 1

Original: Rohmer returns to his historical dramas in the real story of Grace Elliot , an Englishwoman who stayed in France during the apex of the French Revolution . One always suspected that Rohmer was a conservative , but who knew he was such a red-blooded reactionary . If you can put aside Rohmer 's unabashed defense of the monarchy ( and that is not an easy thing to do , given that , for instance , the French lower classes are portrayed here as **hideous** louts ) , this is actually an elegant , intelligent and polished movie . Lacking the money for a big cinematic recreation of 18th century France , Rohmer has instead the actors play against obvious painted cardboards . It is a blatantly artificial conceit , but it somehow works . And newcomer Lucy Russell succeeds in making sympathetic a character that should n't be .

Perturbed: Rohmer returns to his historical dramas in the real story of Grace Elliot , an Englishwoman who stayed in France during the apex of the French Revolution . One always suspected that Rohmer was a conservative , but who knew he was such a red-blooded reactionary . If you can put aside Rohmer 's unabashed defense of the monarchy ( and that is not an easy thing to do , given that , for instance , the French lower classes are portrayed here as **ghastly** louts ) , this is actually an elegant , intelligent and polished movie . Lacking the money for a big cinematic recreation of 18th century France , Rohmer has instead the actors play against obvious painted cardboards . It is a blatantly artificial conceit , but it somehow works . And newcomer Lucy Russell succeeds in making sympathetic a character that should n't be .

Correct label: positive.

Model confidence on original example: 65.2.

Certifiably robust model, example 2

Original: Warning Spoiler . . . I have to agree with you , it was almost there . This was such a bad movie , about such and interesting true story . It had such promise , but the acting was ridiculous at best . Some sets were **beautiful** and realistic . Others are something out of a theme park . I found myself laughing as I watched , what was suppose to be , serious scenes . I really wanted to like this movie , but I could n't . The best part was the fight between friends that ended with the “ King ” dying . I liked the Queens ' punishment . And , the final shot made a beautiful picture , though . There are so many better movies to watch . I do n't recommend this .

Perturbed: Warning Spoiler . . . I have to agree with you , it was almost there . This was such a bad movie , about such and interesting true story . It had such promise , but the acting was ridiculous at best . Some sets were **marvelous** and realistic . Others are something out of a theme park . I found myself laughing as I watched , what was suppose to be , serious scenes . I really wanted to like this movie , but I could n't . The best part was the fight between friends that ended with the “ King ” dying . I liked the Queens ' punishment . And , the final shot made a beautiful picture , though . There are so many better movies to watch . I do n't recommend this .

Correct label: negative.

Model confidence on original example: 56.7.



Certifiably robust model, example 3

Original: “ Raw Force ” is like an ultra-sleazy and perverted version of Love Boat , with additional Kung Fu fights , demented cannibalistic monks , white slaves trade , energetic zombies and a whole lot of **lousy** acting performances . No wonder this movie was included in the recently released “ Grindhouse Experience 20 movie box-set ” . It ’s got everything exploitation fanatics are looking for , blend in a totally **incoherent** and seemingly improvised **script** ! The production values are extremely poor and the technical aspects are **pathetic** , but the amounts of gratuitous violence & sex can hardly be described . The film opens at a tropically sunny location called Warriors Island , where a troop of sneering monks raise the dead for no apparent reason other than to turn them into Kung Fu fighters . The monks also buy sexy slaves from a sleazy Hitler look-alike businessman , supposedly because the women ’s flesh supplies them with the required powers to increase their zombie army . Tourists on a passing cruise ship , among them three martial arts fighters , a female LA cop and a whole bunch of **ravishing** but dim-witted ladies , are attacked by the Hitler guy ’s goons because they were planning an excursion to Warriors Island . Their lifeboat washes ashore the island anyway , and the **monks** challenge the survivors to a fighting test with their zombies . Okay , how does that sound for a crazy midnight horror movie mess ? It ’s not over yet , because “ Raw Force ” also has piranhas , wild boat orgies , Cameron Mitchell in yet another embarrassing lead role and 70 ’s exploitation duchess Camille Keaton ( “ I spit on your Grave ” ) in an utterly insignificant cameo appearance . There ’s loads of **badly** realized gore , including **axe** massacres and decapitations , hammy jokes and bad taste romance . The trash-value of this movie will literally leave you speechless . The evil monks ’ background remains , naturally , unexplained and they do n’t **even** become punished for their questionable hobbies . Maybe that ’s why the movie stops with “ To Be Continued ” , instead of with “ The End ” . The sequel never came , unless it ’s so obscure IMDb does n’t even list it .

Perturbed: “ Raw Force ” is like an ultra-sleazy and perverted version of Love Boat , with additional Kung Fu fights , demented cannibalistic monks , white slaves trade , energetic zombies and a whole lot of **miserable** acting performances . No wonder this movie was included in the recently released “ Grindhouse Experience 20 movie box-set ” . It ’s got everything exploitation fanatics are looking for , blend in a totally **inconsistent** and seemingly improvised **scenario** ! The production values are extremely poor and the technical aspects are **pitiable** , but the amounts of gratuitous violence & sex can hardly be described . The film opens at a tropically sunny location called Warriors Island , where a troop of sneering monks raise the dead for no apparent reason other than to turn them into Kung Fu fighters . The monks also buy sexy slaves from a sleazy Hitler look-alike businessman , supposedly because the women ’s flesh supplies them with the required powers to increase their zombie army . Tourists on a passing cruise ship , among them three martial arts fighters , a female LA cop and a whole bunch of **gorgeous** but dim-witted ladies , are attacked by the Hitler guy ’s goons because they were planning an excursion to Warriors Island . Their lifeboat washes ashore the island anyway , and the **monk** challenge the survivors to a fighting test with their zombies . Okay , how does that sound for a crazy midnight horror movie mess ? It ’s not over yet , because “ Raw Force ” also has piranhas , wild boat orgies , Cameron Mitchell in yet another embarrassing lead role and 70 ’s exploitation duchess Camille Keaton ( “ I spit on your Grave ” ) in an utterly insignificant cameo appearance . There ’s loads of **soresly** realized gore , including **ax** massacres and decapitations , hammy jokes and bad taste romance . The trash-value of this movie will literally leave you speechless . The evil monks ’ background remains , naturally , unexplained and they do n’t **also** become punished for their questionable hobbies . Maybe that ’s why the movie stops with “ To Be Continued ” , instead of with “ The End ” . The sequel never came , unless it ’s so obscure IMDb does n’t even list it .

Correct label: negative.

Model confidence on original example: 72.5.

#### Certifiably robust model, example 4

Original: It was the Sixties , and anyone with long hair and a hip , distant attitude could get money to make a movie . That 's how Michael Sarne , director of this colossal **flop** , was able to get the job . Sarne is one of the most supremely untalented people ever given a dollar to make a movie . In fact , the whole studio must have been tricked into agreeing to hire a guy who had made exactly one previous film , a terribly precious 60's-hip black and white featurette called Joanna . That film starred the similarly talentless actress/waif Genevieve Waite who could barely speak an entire line without breaking into some inappropriate facial expression or bat-like twitter . Sarne , who was probably incapable of directing a cartoon , never mind a big-budget Hollywood film , was in way over his head . David Giler 's book is the best place to go to find out how the faux-infant terrible Sarne was able to pull the wool over everyone 's eyes . If there is ever an historical marker which indicates the superficiality and shallowness of an era , Myra Breckinridge provides that marker . It embodies the emptiness and mindless excess of a decade which is more often remembered for a great sea-change in the body politic . Breckinridge is a touchstone of another , equally important vein . Watch this movie and you 'll get a different perspective on the less-often mentioned vacuity of spirit which so often passed for talent during those years . Many reviewers have spoken about the inter-cutting of footage from other films , especially older ones . Some actually liked these clunky " comments " on what was taking place in the movie , others found them **senseless** , **annoying** , and obtrusive , though since the film is so bad itself any intrusion would have to be an improvement . In my opinion , the real reason Michael Sarne put so many film clips into Myra Breckinridge was to **paper** over the bottomless insufficiency of wit and imagination that he possessed . That is to say , Sarne was so imagination-challenged that he just threw these clips in to fill space and take up time . They were n't inspiration , they were desperation . His writing skills were nonexistent , and David Giler had wisely stepped away from the project as one might from a ticking bomb , so Sarne was left to actually try and make a movie , and he could n't . It was beyond his slim capabilities . Hence the introduction of what seems like one half of an entire film 's worth of clips . The ghosts of writers and directors - many long since passed on - were called upon to fix this calamitous flopperoo because Sarne sure as heck was n't able to . This was what he came up with on those days he sat on the set and thought for eight hours while the entire cast and crew ( not to mention the producers and the **accountants** ) cooled their heels and waited for something , some **great** spark of imagination , a hint of originality , a soupcon of wit , to crackle forth from the brow of Zeus . Um , oops . No Zeus + no imagination + no sparks = millions of little dollar bills with tiny wings - each made from the hundreds of licensing agreements required to use the clips - flying out the window . Bye-bye . As for myself , I hated the film clips . They denigrated Sarne 's many betters , poked fun at people whose talents - even those whose skills were not **great** - far outstripped the abilities of the director and so ultimately served to show how lacking he was in inspiration , originality - and even of plain competency - compared to even the cheesiest of them .

Perturbed: It was the Sixties , and anyone with long hair and a hip , distant attitude could get money to make a movie . That 's how Michael Sarne , director of this colossal **bankruptcy** , was able to get the job . Sarne is one of the most supremely untalented people ever given a dollar to make a movie . In fact , the whole studio must have been tricked into agreeing to hire a guy who had made exactly one previous film , a terribly precious 60's-hip black and white featurette called Joanna . That film starred the similarly talentless actress/waif Genevieve Waite who could barely speak an entire line without breaking into some inappropriate facial expression or bat-like twitter . Sarne , who was probably incapable of directing a cartoon , never mind a big-budget Hollywood film , was in way over his head . David Giler 's book is the best place to go to find out how the faux-infant terrible Sarne was able to pull the wool over everyone 's eyes . If there is ever an historical marker which indicates the superficiality and shallowness of an era , Myra Breckinridge provides that marker . It embodies the emptiness and mindless excess of a decade which is more often remembered for a great sea-change in the body politic . Breckinridge is a touchstone of another , equally important vein . Watch this movie and you 'll get a different perspective on the less-often mentioned vacuity of spirit which so often passed for talent during those years . Many reviewers have spoken about the inter-cutting of footage from other films , especially older ones . Some actually liked these clunky " comments " on what was taking place in the movie , others found them **wanton** , **troublesome** , and obtrusive , though since the film is so bad itself any intrusion would have to be an improvement . In my opinion , the real reason Michael Sarne put so many film clips into Myra Breckinridge was to **papers** over the bottomless insufficiency of wit and imagination that he possessed . That is to say , Sarne was so imagination-challenged that he just threw these clips in to fill space and take up time . They were n't inspiration , they were desperation . His writing skills were nonexistent , and David Giler had wisely stepped away from the project as one might from a ticking bomb , so Sarne was left to actually try and make a movie , and he could n't . It was beyond his slim capabilities . Hence the introduction of what seems like one half of an entire film 's worth of clips . The ghosts of writers and directors - many long since passed on - were called upon to fix this calamitous flopperoo because Sarne sure as heck was n't able to . This was what he came up with on those days he sat on the set and thought for eight hours while the entire cast and crew ( not to mention the producers and the **accounting** ) cooled their heels and waited for something , some **magnificent** spark of imagination , a hint of originality , a soupcon of wit , to crackle forth from the brow of Zeus . Um , oops . No Zeus + no imagination + no sparks = millions of little dollar bills with tiny wings - each made from the hundreds of licensing agreements required to use the clips - flying out the window . Bye-bye . As for myself , I hated the film clips . They denigrated Sarne 's many betters , poked fun at people whose talents - even those whose skills were not **magnificent** - far outstripped the abilities of the director and so ultimately served to show how lacking he was in inspiration , originality - and even of plain competency - compared to even the cheesiest of them .

Correct label: negative.

Model confidence on original example: 55.9.

Certifiably robust model, example 5

Original: I totally got drawn into this and could n't wait for each episode . The **acting** brought to life how emotional a missing person in the family must be , together with the effects it would have on those closest . The only problem we as a family had was how quickly it was all 'explained ' at the end . We could n't hear clearly what was said and have no idea what Gary 's part in the whole thing was ? Why did Kyle phone him and why did he go along with it ? Having invested in a series for five hours we felt **cheated** that only five minutes was kept back for the conclusion . I have asked around and none of my friends who watched it were any the wiser either . Very strange but maybe we missed something crucial ? ? ? ?

Perturbed: I totally got drawn into this and could n't wait for each episode . The **behaving** brought to life how emotional a missing person in the family must be , together with the effects it would have on those closest . The only problem we as a family had was how quickly it was all 'explained ' at the end . We could n't hear clearly what was said and have no idea what Gary 's part in the whole thing was ? Why did Kyle phone him and why did he go along with it ? Having invested in a series for five hours we felt **hoodwinked** that only five minutes was kept back for the conclusion . I have asked around and none of my friends who watched it were any the wiser either . Very strange but maybe we missed something crucial ? ? ? ?

Correct label: positive.

Model confidence on original example: 50.3.

Certifiably robust model, example 6

Original: One of the more sensible comedies to hit the Hindi film screens . A remake of Priyadarshans 80s Malayalam hit Boeing Boeing , which in turn was a remake of the 60s Hollywood hit of the same name , Garam Masala elevates the standard of comedies in Hindi Cinema . Akshay Kumar has once again proved his is one of the best super stars of Hindi cinema who can do comedy . He has combined well with the new hunk John Abraham . However John still remains in Akshays shadows and **fails** to rise to the occasion . The new gals are cute and do complete justice to their roles . A must watch comedy . Leave your brains away and **laugh** for 2 hrs ! ! ! ! After all laughter is the best medicine ! Ask Priyadarshan and Akshay Kumar ! ! ! ! !

Perturbed: One of the more sensible comedies to hit the Hindi film screens . A remake of Priyadarshans 80s Malayalam hit Boeing Boeing , which in turn was a remake of the 60s Hollywood hit of the same name , Garam Masala elevates the standard of comedies in Hindi Cinema . Akshay Kumar has once again proved his is one of the best super stars of Hindi cinema who can do comedy . He has combined well with the new hunk John Abraham . However John still remains in Akshays shadows and **neglects** to rise to the occasion . The new gals are cute and do complete justice to their roles . A must watch comedy . Leave your brains away and **laughed** for 2 hrs ! ! ! ! After all laughter is the best medicine ! Ask Priyadarshan and Akshay Kumar ! ! ! ! !

Correct label: positive.

Model confidence on original example: 51.3.

Certifiably robust model, example 7

Original: DER TODESKING is not one of my **favorite** Jorg Buttgereit film - but still is an interesting film dealing with suicide and it 's reasons and ramifications . Those looking for a gore-fest , or exploitation in the style of the NEKROMANTIK films or SCHRAMM will probably be **disappointed** . DER TODESKING is definitely an “ art-house ” style film , so those that need linear , explainable narratives need not apply ... The basic concept of DER TODESKING is that there is an “ episode ” for each day of the week that revolves around a strange chain letter that apparently causes people to commit suicide , interspersed with scenes of a slowly decomposing corpse ... There are some very well done and thought provoking scenes , including the man talking about the “ problems ” with his wife , and the concert massacre ( which unfortunately lost some of it 's “ power ” on me , because I was too busy laughing at the SCORPIONS look-alike band on stage ... ) . But seriously - this is a sometimes **beautiful** ( the scene that shows different angles of that huge bridge is particularly effective - especially if you understand the significance of the scene , and that the names shown are of people that actually committed suicide from jumping from the bridge ... ) , sometimes confusing , sometimes silly ( the SHE WOLF OF THE SS rip-off is pretty amusing ) , sometimes **harrowing** ( I found the scene of the guy talking to the girl in the park about his wife particularly effective ) film that is more of an “ experience ” then just entertainment , as many of these “ art ” films are meant to be . Still , I did n't find DER TODESKING to be as strong as NEKROMANTIK or SCHRAMM , and would probably put it on relatively even footing with NEKROMANTIK 2 in terms of my personally “ enjoyment level ” . Definitely worth a look to any Buttgereit or “ art ” film fan . If you dig this type of film - check out SUBCONSCIOUS CRUELTY - in my opinion the BEST art-house/horror film that I 've seen . 7/10 for DER TODESKING

Perturbed: DER TODESKING is not one of my **preferred** Jorg Buttgereit film - but still is an interesting film dealing with suicide and it 's reasons and ramifications . Those looking for a gore-fest , or exploitation in the style of the NEKROMANTIK films or SCHRAMM will probably be **disappointing** . DER TODESKING is definitely an “ art-house ” style film , so those that need linear , explainable narratives need not apply ... The basic concept of DER TODESKING is that there is an “ episode ” for each day of the week that revolves around a strange chain letter that apparently causes people to commit suicide , interspersed with scenes of a slowly decomposing corpse ... There are some very well done and thought provoking scenes , including the man talking about the “ problems ” with his wife , and the concert massacre ( which unfortunately lost some of it 's “ power ” on me , because I was too busy laughing at the SCORPIONS look-alike band on stage ... ) . But seriously - this is a sometimes **handsome** ( the scene that shows different angles of that huge bridge is particularly effective - especially if you understand the significance of the scene , and that the names shown are of people that actually committed suicide from jumping from the bridge ... ) , sometimes confusing , sometimes silly ( the SHE WOLF OF THE SS rip-off is pretty amusing ) , sometimes **dreadful** ( I found the scene of the guy talking to the girl in the park about his wife particularly effective ) film that is more of an “ experience ” then just entertainment , as many of these “ art ” films are meant to be . Still , I did n't find DER TODESKING to be as strong as NEKROMANTIK or SCHRAMM , and would probably put it on relatively even footing with NEKROMANTIK 2 in terms of my personally “ enjoyment level ” . Definitely worth a look to any Buttgereit or “ art ” film fan . If you dig this type of film - check out SUBCONSCIOUS CRUELTY - in my opinion the BEST art-house/horror film that I 've seen . 7/10 for DER TODESKING

Correct label: positive.

Model confidence on original example: 61.5.

Certifiably robust model, example 8

Original: Growing up , Joe Strummer was a hero of mine , but even I was left cold by this film . For better and worse , The Future Is Unwritten is not a straightforward “ Behind the Music ” style documentary . Rather it is a biographical art film , chock full of interviews , performance footage , home movies , and mostly **pointless** animation sketches lifted from “ Animal Farm . ” The movie is coherent but overlong by about a half hour . The campfire format , while touching in thought , is actually pretty annoying in execution . First off , without titles , its hard to even know who half of these interviewees are . Secondly , who really needs to hear people like Bono , Johnny Depp , and John Cusack mouth butt licking hosannas about the man ? They were not relevant to Strummer ’s life and their opinions add nothing to his story . This picture is at it ’s best when Strummer , through taped interviews and conversation , touches on facets of his life most people did not know about : the suicide of his older brother , coming to terms with the death of his parents , the joy of fatherhood . To me , these were most moving because it showed Joe Strummer not as the punk icon we all knew and loved , but as a regular human being who had to deal with the joys and sorrows of life we all must face . There have been better , more straightforward documentaries about Strummer and The Clash . ( Westway , VH1 Legends , and Kurt Loder ’s narrated MTV Documentary from the early 90 ’s come to mind . ) Joe Strummer : The Future Is Unwritten is for diehards only .

Perturbed: Growing up , Joe Strummer was a hero of mine , but even I was left cold by this film . For better and worse , The Future Is Unwritten is not a straightforward “ Behind the Music ” style documentary . Rather it is a biographical art film , chock full of interviews , performance footage , home movies , and mostly **unnecessary** animation sketches lifted from “ Animal Farm . ” The movie is coherent but overlong by about a half hour . The campfire format , while touching in thought , is actually pretty annoying in execution . First off , without titles , its hard to even know who half of these interviewees are . Secondly , who really needs to hear people like Bono , Johnny Depp , and John Cusack mouth butt licking hosannas about the man ? They were not relevant to Strummer ’s life and their opinions add nothing to his story . This picture is at it ’s best when Strummer , through taped interviews and conversation , touches on facets of his life most people did not know about : the suicide of his older brother , coming to terms with the death of his parents , the joy of fatherhood . To me , these were most moving because it showed Joe Strummer not as the punk icon we all knew and loved , but as a regular human being who had to deal with the joys and sorrows of life we all must face . There have been better , more straightforward documentaries about Strummer and The Clash . ( Westway , VH1 Legends , and Kurt Loder ’s narrated MTV Documentary from the early 90 ’s come to mind . ) Joe Strummer : The Future Is Unwritten is for diehards only .

Correct label: negative.

Model confidence on original example: 50.1.

Certifiably robust model, example 9

Original: The film begins with people on Earth discovering that their rocket to Mars had not been lost but was just drifting out in Space near out planet . When it 's retrieved , one of the crew members is ill , one is alive and the other two are missing . What happened to them is told through a flashback by the surviving member . While on Mars , the crew was apparently attacked by a whole host of very silly bug-eyed monsters . Oddly , while the sets were pretty good , the monsters were among the **silliest** I have seen on film . Plus , in an odd attempt at realism , the production used a process called “ Cinemagic ” . Unfortunately , this wonderful innovation just made the film look pretty cheap when they were on the surface of Mars AND the intensity of the redness practically made my eyes bleed – it was THAT bad ! ! Despite all the cheese , the film did have a somewhat interesting plot as well as a good message about space travel . For lovers of the genre , it 's well worth seeing . For others , you may just find the whole thing rather silly – see for yourself and decide . While by today 's standards this is n't an especially good sci-fi film , compared with the films being made at the time , it stacks up pretty well . PS – When you watch the film , pay careful attention to Dr. Tremayne . He looks like the spitting image of Dr. Quest from the “ Jonny Quest ” cartoon ! Plus , he sounds and acts a lot like him , too .

Perturbed: The film begins with people on Earth discovering that their rocket to Mars had not been lost but was just drifting out in Space near out planet . When it 's retrieved , one of the crew members is ill , one is alive and the other two are missing . What happened to them is told through a flashback by the surviving member . While on Mars , the crew was apparently attacked by a whole host of very silly bug-eyed monsters . Oddly , while the sets were pretty good , the monsters were among the **weirdest** I have seen on film . Plus , in an odd attempt at realism , the production used a process called “ Cinemagic ” . Unfortunately , this wonderful innovation just made the film look pretty cheap when they were on the surface of Mars AND the intensity of the redness practically made my eyes bleed – it was THAT bad ! ! Despite all the cheese , the film did have a somewhat interesting plot as well as a good message about space travel . For lovers of the genre , it 's well worth seeing . For others , you may just find the whole thing rather silly – see for yourself and decide . While by today 's standards this is n't an especially good sci-fi film , compared with the films being made at the time , it stacks up pretty well . PS – When you watch the film , pay careful attention to Dr. Tremayne . He looks like the spitting image of Dr. Quest from the “ Jonny Quest ” cartoon ! Plus , he sounds and acts a lot like him , too .

Correct label: negative.

Model confidence on original example: 54.8.

Certifiably robust model, example 10

Original: “ Sir ” John Gielgud must have become senile to star in a mess of a movie like this one . ; This is one of those films , I suppose , that is considered “ art , ” but do n’t be fooled ... ..it ’s **garbage** . Stick to the “ art ” you can admire in a frame because the films that are labeled as such are usually unintelligible forgeries like this . In this masterpiece , Giegud recites Shakespeare ’s “ The Tempest ” while the camera pans away to nude people . one of them a little kid **urinating** in a swimming pool . Wow , this is heady stuff and real “ art , ” ai n’t it ? ? That ’s just one example . Most of the story makes no sense , is impossible to follow and , hence , is one that Liberal critics are afraid to say they did n’t “ understand ” so they give it high marks to save their phony egos . You want Shakespeare ? Read his books .

Perturbed: “ Sir ” John Gielgud must have become senile to star in a mess of a movie like this one . ; This is one of those films , I suppose , that is considered “ art , ” but do n’t be fooled ... ..it ’s **refuse** . Stick to the “ art ” you can admire in a frame because the films that are labeled as such are usually unintelligible forgeries like this . In this masterpiece , Giegud recites Shakespeare ’s “ The Tempest ” while the camera pans away to nude people . one of them a little kid **urinate** in a swimming pool . Wow , this is heady stuff and real “ art , ” ai n’t it ? ? That ’s just one example . Most of the story makes no sense , is impossible to follow and , hence , is one that Liberal critics are afraid to say they did n’t “ understand ” so they give it high marks to save their phony egos . You want Shakespeare ? Read his books .

Correct label: negative.

Model confidence on original example: 67.7.

#### Data augmentation model, example 1

Original: I hope whoever coached these losers on their accents was fired . The only high points are a few of the supporting characters , 3 of 5 of my favourites **were** killed off by the end of the season ( and one of them was a cat , to put that into perspective ) . The whole storyline is centered around sex , and nothing else . Sex with vampires , gay sex with **gay** vampires , gay sex with straight vampires , sex to score vampire blood , sex after drinking vampire blood , sex in front of vampires , vampire sex , non-vampire sex , sex because we 're scared of vampires , sex because we 're mad at vampires , sex because we just became a vampire , etc . Nothing against sex , it would just be nice if it were a little more subtle with being peppered into the storyline . Perhaps HAVE a storyline and then shoehorn some sex into it . But they did n't even bother to do that ... and Anna Paquin is a dizzy gap-tooth bitch . Either she sucks or her character **sucks** , I ca n't figure out which . Another part of the storyline that I find highly **implausible** is why 150 year old vampire Bill who seems to have his things together would be interested in someone like Sookie . She 's constantly flying off the handle at him for things he ca n't control . He leaves for two days and she already decides that he 's “ not coming back ” and suddenly has feelings for dog-man ? Give me a break . She 's supposed to be a 25 year old woman , not a 14 year old girl . People close to her are dying all over , and she 's got the brightest smile on her face because she just gave away her V-card to some dude because she ca n't read his mind ? As the main character of the story , I would 've hoped the show would do a little more to make her understandable and someone to invest your interest in , not someone you keep secretly hoping gets killed off or put into a coma . I ca n't find anything about her character that I like and even the fact that she can read minds is impressively **uninspiring** and not the least bit interesting . I will not be wasting my time with watching Season 2 come June .

Perturbed: I hope whoever coached these losers on their accents was fired . The only high points are a few of the supporting characters , 3 of 5 of my favourites **was** killed off by the end of the season ( and one of them was a cat , to put that into perspective ) . The whole storyline is centered around sex , and nothing else . Sex with vampires , gay sex with **homosexual** vampires , gay sex with straight vampires , sex to score vampire blood , sex after drinking vampire blood , sex in front of vampires , vampire sex , non-vampire sex , sex because we 're scared of vampires , sex because we 're mad at vampires , sex because we just became a vampire , etc . Nothing against sex , it would just be nice if it were a little more subtle with being peppered into the storyline . Perhaps HAVE a storyline and then shoehorn some sex into it . But they did n't even bother to do that ... and Anna Paquin is a dizzy gap-tooth bitch . Either she sucks or her character **fears** , I ca n't figure out which . Another part of the storyline that I find highly **improbable** is why 150 year old vampire Bill who seems to have his things together would be interested in someone like Sookie . She 's constantly flying off the handle at him for things he ca n't control . He leaves for two days and she already decides that he 's “ not coming back ” and suddenly has feelings for dog-man ? Give me a break . She 's supposed to be a 25 year old woman , not a 14 year old girl . People close to her are dying all over , and she 's got the brightest smile on her face because she just gave away her V-card to some dude because she ca n't read his mind ? As the main character of the story , I would 've hoped the show would do a little more to make her understandable and someone to invest your interest in , not someone you keep secretly hoping gets killed off or put into a coma . I ca n't find anything about her character that I like and even the fact that she can read minds is impressively **dreary** and not the least bit interesting . I will not be wasting my time with watching Season 2 come June .

Correct label: negative.

Model confidence on original example: 79.4.



#### Data augmentation model, example 2

Original: Well this movie is **amazingly awful** . I felt sorry for the actors involved in this project because I 'm **sure** they did not write their lines . Which were sometimes delivered with slight sarcasm , which lead me to believe they were not taking this movie seriously , nor **could** anybody who watches this **obnoxious** off beat monster slasher . While watching this “ Creature Unknown ” I could not help but think that there was not much of a budget or a competent writer on the crew . But , if you go into watching this for a laugh you 'll be happy , the movie is **shameless** to mocking itself because i cant see how anybody **could** look at this and be proud of pumping this straight to DVD clichd wan na be action thriller/horror movie fightfest to light .

Perturbed: Well this movie is **marvellously horrifying** . I felt sorry for the actors involved in this project because I 'm **confident** they did not write their lines . Which were sometimes delivered with slight sarcasm , which lead me to believe they were not taking this movie seriously , nor **would** anybody who watches this **abhorrent** off beat monster slasher . While watching this “ Creature Unknown ” I could not help but think that there was not much of a budget or a competent writer on the crew . But , if you go into watching this for a laugh you 'll be happy , the movie is **cheeky** to mocking itself because i cant see how anybody **would** look at this and be proud of pumping this straight to DVD clichd wan na be action thriller/horror movie fightfest to light .

Correct label: negative.

Model confidence on original example: 97.8.

#### Data augmentation model, example 3

Original: Watched on Hulu ( far too many **commercials** ! ) so it **broke** the pacing but even still , it was like watching a really **bad** buddy movie from the early sixties . Dean Martin and Jerry Lewis where both parts are **played** by Jerry Lewis . If I were Indian , I 'd protest the portrayal of all males as venal and all women as shrews . They cheated for the music videos for western sales and **used** a lot of western models so the males could touch them I **usually enjoy** Indian films a lot but this was a major **disappointment** , especially for a modern Indian film . The **story** does n't take place in India ( the uncle keeps referring to when Mac will return to India ) but I ca n't find out where it is supposed to be happening .

Perturbed: Watched on Hulu ( far too many **announcements** ! ) so it **cracked** the pacing but even still , it was like watching a really **wicked** buddy movie from the early sixties . Dean Martin and Jerry Lewis where both parts are **accomplished** by Jerry Lewis . If I were Indian , I 'd protest the portrayal of all males as venal and all women as shrews . They cheated for the music videos for western sales and **utilizes** a lot of western models so the males could touch them I **commonly savor** Indian films a lot but this was a major **frustration** , especially for a modern Indian film . The **history** does n't take place in India ( the uncle keeps referring to when Mac will return to India ) but I ca n't find out where it is supposed to be happening .

Correct label: negative.

Model confidence on original example: 90.1.

#### Data augmentation model, example 4

Original: Weak start , solid middle , fantastic finish . That 's my impression of this film , anyway . I liked Simon Pegg in the two films I 've seen him in -- Hot Fuzz , and Shaun of the Dead . His role here , though , took a completely different turn . Shows his range as an actor , but nonetheless I really disliked th character as he was portrayed at the beginning . There 's a kind of humour I call " frustration **comedy** . " Its supposed " jokes " and wit are really nothing more than painful and awkward moments . Much like the Bean character Rowan Atkinmson plays . There are a number of other comedic actors who portray similar characters too . I do n't mean to bash them here , so will not . But do be warned that if you are like me , and you dislike smarmy and maddeningly bungling idiots , Pegg shows just such characteristics for the first third of this film . It DOES get better , however . I read somewhere that this is based on a true story . Hmmm . Maybe . The film 's story stopped being annoying , and became kind of a triumph of the " little guy " in the final third . I do n't need all films to be sugar and light -- but coincidentally , as this film got better , it also started to be more and more of a happy ending . It was also a pleasure to see an old favourite , Jeff Bridges , play a role so masterfully . I liked " Iron Man , " but was saddened by the fact that Bridges ' character was a villain . Purely personal taste , of course , as his acting in that was superb . Nonetheless , he was a marvel here as the Bigger Than Life man of vision , the publisher of Sharps . It was nice to see him in a role that I could actually enjoy . Overall then , I liked it ! I just wish I had come in 40 minutes late , and missed the beginning .

Perturbed: Weak start , solid middle , fantastic finish . That 's my impression of this film , anyway . I liked Simon Pegg in the two films I 've seen him in -- Hot Fuzz , and Shaun of the Dead . His role here , though , took a completely different turn . Shows his range as an actor , but nonetheless I really disliked th character as he was portrayed at the beginning . There 's a kind of humour I call " frustration **charade** . " Its supposed " jokes " and wit are really nothing more than painful and awkward moments . Much like the Bean character Rowan Atkinmson plays . There are a number of other comedic actors who portray similar characters too . I do n't mean to bash them here , so will not . But do be warned that if you are like me , and you dislike smarmy and maddeningly bungling idiots , Pegg shows just such characteristics for the first third of this film . It DOES get better , however . I read somewhere that this is based on a true story . Hmmm . Maybe . The film 's story stopped being annoying , and became kind of a triumph of the " little guy " in the final third . I do n't need all films to be sugar and light -- but coincidentally , as this film got better , it also started to be more and more of a happy ending . It was also a pleasure to see an old favourite , Jeff Bridges , play a role so masterfully . I liked " Iron Man , " but was saddened by the fact that Bridges ' character was a villain . Purely personal taste , of course , as his acting in that was superb . Nonetheless , he was a marvel here as the Bigger Than Life man of vision , the publisher of Sharps . It was nice to see him in a role that I could actually enjoy . Overall then , I liked it ! I just wish I had come in 40 minutes late , and missed the beginning .

Correct label: positive.

Model confidence on original example: 57.0.

#### Data augmentation model, example 5

Original: How The Grinch Stole Christmas instantly **stole** my heart and **became** my favorite **movie** almost from my very first **viewing** . Now , eight viewings later , it still **has** the same impact on me as it did the first time I **saw** it . Screenwriters Jeffery Price & Peter S. Seaman of Who Framed Roger Rabbit **fame** do a **fantastic** job of **adapting** the story of The Grinch to the screen . Ron Howard 's direction brought the **story** to full **life** , and Jim Carrey 's typically **energetic** performance as The Grinch steals the show . Some detractors of the film have claimed that it is not true to the **spirit** or principles of the original story . Having read the original story , I **must** say I can not agree . The movie makes the very same point about Christmas and its true meaning as the original story . Indeed , it **enhances** the **impact** of the **story** by making it more personal by showing us how and why The Grinch **became** what he was . \*MILD SPOILERS\* ( They probably would n't ruin the movie for you ... but **if** you have n't **seen** it **yet** and you 're one of those who wants to know NOTHING about a story until you 've seen it , you should skip the next two paragraphs . ) I think just about everyone can relate to The Grinch 's **terrible experiences** in school . I think all of us , at one time or another , were the **unpopular** one in school who was always **picked** on . I know I was ... and that 's why I personally had so much sympathy for The Grinch and what he went through . And Cindy Lou Who 's naive idealism , believing that nobody can be all **bad** , was heart rending . When **everyone** else had turned their backs on The Grinch out of **fear** and **ignorance** , Cindy Lou was determined to be his friend . If only everyone could have such an attitude . In fact , I think the only thing that might 've **made** the film a little better would have been to **further** tone down the adult **humor** and content . It was already **pretty restrained** , but any of this **adult humor** ( like when The Grinch slammed nose first into Martha May Whovier 's cleavage ) just does n't fit in a story like this . This one 's well on its way to being a Christmas classic , **taking a richly deserved** place alongside the book and the Chuck Jones cartoon as a must-see of **every** Christmas season .

Perturbed: How The Grinch Stole Christmas instantly **stolen** my heart and **went** my favorite **films** almost from my very first **opinion** . Now , eight viewings later , it still **had** the same impact on me as it did the first time I **watched** it . Screenwriters Jeffery Price & Peter S. Seaman of Who Framed Roger Rabbit **celebrity** do a **wondrous** job of **adaptation** the story of The Grinch to the screen . Ron Howard 's direction brought the **storytelling** to full **lifetime** , and Jim Carrey 's typically **dynamic** performance as The Grinch steals the show . Some detractors of the film have claimed that it is not true to the **gist** or principles of the original story . Having read the original story , I **should** say I can not agree . The movie makes the very same point about Christmas and its true meaning as the original story . Indeed , it **improves** the **influence** of the **storytelling** by making it more personal by showing us how and why The Grinch **went** what he was . \*MILD SPOILERS\* ( They probably would n't ruin the movie for you ... but **whether** you have n't **noticed** it **though** and you 're one of those who wants to know NOTHING about a story until you 've seen it , you should skip the next two paragraphs . ) I think just about everyone can relate to The Grinch 's **awful experiment** in school . I think all of us , at one time or another , were the **unwanted** one in school who was always **pick** on . I know I was ... and that 's why I personally had so much sympathy for The Grinch and what he went through . And Cindy Lou Who 's naive idealism , believing that nobody can be all **horrid** , was heart rending . When **somebody** else had turned their backs on The Grinch out of **angst** and **ignorant** , Cindy Lou was determined to be his friend . If only everyone could have such an attitude . In fact , I think the only thing that might 've **brought** the film a little better would have been to **furthermore** tone down the adult **comedy** and content . It was already **abundantly scant** , but any of this **grownups comedy** ( like when The Grinch slammed nose first into Martha May Whovier 's cleavage ) just does n't fit in a story like this . This one 's well on its way to being a Christmas classic , **pick a meticulously deserving** place alongside the book and the Chuck Jones cartoon as a must-see of **any** Christmas season .

Correct label: positive.

Model confidence on original example: 96.4.

#### Data augmentation model, example 6

Original: **so** ... it 's really sexist , and classist , and i thought that it might not be in the beginning stages of the movie , like when stella tells steven that she would really like to change herself and begin speaking in the right way and he tells her not to change . well , he certainly **changed** his tune , and it seems that the other reviewers followed suit . what at the beginning appears to be a love story is really about social placement and women as sacrificial mothers . the end of the movie does not make **her** a hero , it makes the whole thing **sad** . and its sad that people think it makes her a hero . perhaps that is the comment of the movie that people should take away . positive reception reflects continual patriarchal **currents** in the social conscience . **yuck** .

Perturbed: **even** ... it 's really sexist , and classist , and i thought that it might not be in the beginning stages of the movie , like when stella tells steven that she would really like to change herself and begin speaking in the right way and he tells her not to change . well , he certainly **change** his tune , and it seems that the other reviewers followed suit . what at the beginning appears to be a love story is really about social placement and women as sacrificial mothers . the end of the movie does not make **his** a hero , it makes the whole thing **hapless** . and its sad that people think it makes her a hero . perhaps that is the comment of the movie that people should take away . positive reception reflects continual patriarchal **current** in the social conscience . **eww** .

Correct label: negative.

Model confidence on original example: 83.0.

#### Data augmentation model, example 7

Original: Michael Kallio gives a strong and convincing performance as Eric Seaver , a troubled young **man** who was horribly mistreated as a little boy by his **monstrous** , abusive , alcoholic stepfather Barry ( a **genuinely frightening portrayal** by Gunnar Hansen ) . Eric has a compassionate fianc ( sweetly played by the **lovely** Tracee Newberry ) and a **job** transcribing autopsy reports at a local morgue . Haunted by his bleak past , egged on by the bald , beaming Jack the demon ( a truly **creepy** Michael Robert Brandon ) , and sent over the edge by the recent death of his mother , Eric goes off the deep end and embarks on a brutal killing spree . Capably directed by Kallio ( who also wrote the tight , astute script ) , with uniformly fine acting by a sound no-name cast ( Jeff Steiger is especially good as Eric 's wannabe helpful guardian angel Michael ) , rather rough , but **overall** polished cinematography by George Lieber , **believable** true-to-life characters , jolting outbursts of raw , **shocking** and unflinchingly **ferocious** violence , a **moody** , **spooky** score by Dan Kolton , an uncompromisingly **downbeat** ending , grungy Detroit , Michigan **locations** , a grimly serious **tone** , and a taut , gripping narrative that stays on a steady track throughout , this extremely potent and gritty **psychological** horror thriller makes for often absorbing and disturbing viewing . A real sleeper .

Perturbed: Michael Kallio gives a strong and convincing performance as Eric Seaver , a troubled young **guy** who was horribly mistreated as a little boy by his **atrocious** , abusive , alcoholic stepfather Barry ( a **honestly terrible description** by Gunnar Hansen ) . Eric has a compassionate fianc ( sweetly played by the **handsome** Tracee Newberry ) and a **work** transcribing autopsy reports at a local morgue . Haunted by his bleak past , egged on by the bald , beaming Jack the demon ( a truly **horrible** Michael Robert Brandon ) , and sent over the edge by the recent death of his mother , Eric goes off the deep end and embarks on a brutal killing spree . Capably directed by Kallio ( who also wrote the tight , astute script ) , with uniformly fine acting by a sound no-name cast ( Jeff Steiger is especially good as Eric 's wannabe helpful guardian angel Michael ) , rather rough , but **general** polished cinematography by George Lieber , **plausible** true-to-life characters , jolting outbursts of raw , **appalling** and unflinchingly **brutish** violence , a **lunatic** , **terrible** score by Dan Kolton , an uncompromisingly **dismal** ending , grungy Detroit , Michigan **placements** , a grimly serious **tones** , and a taut , gripping narrative that stays on a steady track throughout , this extremely potent and gritty **psychiatric** horror thriller makes for often absorbing and disturbing viewing . A real sleeper .

Correct label: positive.

Model confidence on original example: 99.9.

## Data augmentation model, example 8

Original: When a **stiff** turns up with pneumonic plague ( a variant of bubonic plague ) , U.S. Public Health Service official Dr. Clinton Reed ( Richard Widmark ) immediately quarantines everyone whom he knows was near the body . Unfortunately , the stiff got that way by being murdered , and there 's a good chance that the murderer will start spreading the plague , leading to an epidemic . Enter Police Captain Tom Warren ( Paul Douglas ) , who is **enlisted** to track down the murderer as soon as possible and avert a **possible** national disaster . While Panic in the Streets is a quality film , it suffers from being slightly unfocused and a bit too sprawling ( my **reason** for bringing the score down to an eight ) . It wanders the genres from noirish gangster to medical disaster , **police** procedural , thriller and even romance . This is not director Elia Kazan 's **best** work , but **saying** that is a bit disingenuous . Kazan is the helmer **responsible** such masterpieces as A Streetcar Named Desire ( 1951 ) , On The Waterfront ( 1954 ) and East of Eden ( 1955 ) , after all . This film predates those , but Kazan **has** said that he was already “ untethered ” by the studio . Taking that **freedom** too far may partially account for the sprawl . The film is set in New Orleans , a city where Kazan “ used to wander around . . . night and day so I knew it well ” . He wanted to exploit the environment . “ It 's so terrific and **colorful** . I wanted boats , steam **engines** , **warehouses** , jazz joints – all of New Orleans ” . Kazan handles each genre of Panic in the Streets well , but they could be connected better . The film would have benefited by staying with just one or two of its **moods** . The sprawl in terms of setting would have **still** worked . Part of the **dilemma** may have been caused by the fact that Panic in the Streets was an attempt to merge two stories by writers Edna and Edward Anhalt , “ Quarantine ” and “ Some Like 'Em Cold ” . The gangster material , which ends up in firmly in thriller territory with an extended chase scene near the end of the **film** , is probably the highlight . Not surprisingly , Kazan has said that he believes the villains are “ more colorful – I never had much affection for the good guys anyway . I do n't like puritans ” . A close second is the only material that approaches the “ panic ” of the title – the discovery of the plague and the **attempts** to track down the **exposed** , inoculate them and contain the **disease** . While there is plenty of suspense during these two “ **moods** ” , much of the film is also a **fairly** straightforward drama , with pacing more **typical** of that genre . The dialogue throughout is excellent . The stylistic **difference** to many modern films could hardly be more pronounced . It is intelligent , delivered **quickly** and well enunciated by each character . Conflict is n't created by “ **dumb** ” decisions but smart **moves** ; events and characters ' actions are more like a chess game . When unusual stances are taken , such as Reed withholding the plague from the **newspapers** , he gives **relatively** lengthy justifications for his decisions , which other characters argue over . In light of this , it 's **interesting** that Kazan believed that “ **propriety** , religion , **ethics** and the middle class are all murdering us ” . That idea works its way into the film through the alterations to the norm , or allowances away from it , made by the protagonists . For example , head gangster Blackie ( Jack Palance in his first film role ) is offered a “ Get Out of Jail Free ” card if he 'll cooperate with combating the plague . The technical **aspects** of the film are **fine** , if nothing exceptional , but the real reasons to watch are the performances , the intriguing **scenario** and the well-written dialogue .

Perturbed: When a **rigid** turns up with pneumonic plague ( a variant of bubonic plague ) , U.S. Public Health Service official Dr. Clinton Reed ( Richard Widmark ) immediately quarantines everyone whom he knows was near the body . Unfortunately , the stiff got that way by being murdered , and there 's a good chance that the murderer will start spreading the plague , leading to an epidemic . Enter Police Captain Tom Warren ( Paul Douglas ) , who is **recruited** to track down the murderer as soon as possible and avert a **probable** national disaster . While Panic in the Streets is a quality film , it suffers from being slightly unfocused and a bit too sprawling ( my **justification** for bringing the score down to an eight ) . It wanders the genres from noirish gangster to medical disaster , **cops** procedural , thriller and even romance . This is not director Elia Kazan 's **better** work , but **arguing** that is a bit disingenuous . Kazan is the helmer **liable** such masterpieces as A Streetcar Named Desire ( 1951 ) , On The Waterfront ( 1954 ) and East of Eden ( 1955 ) , after all . This film predates those , but Kazan **have** said that he was already “ untethered ” by the studio . Taking that **freely** too far may partially account for the sprawl . The film is set in New Orleans , a city where Kazan “ used to wander around . . . night and day so I knew it well ” . He wanted to exploit the environment . “ It 's so terrific and **colored** . I wanted boats , steam **motors** , **stores** , jazz joints – all of New Orleans ” . Kazan handles each genre of Panic in the Streets well , but they could be connected better . The film would have benefited by staying with just one or two of its **passions** . The sprawl in terms of setting would have **however** worked . Part of the **stalemate** may have been caused by the fact that Panic in the Streets was an attempt to merge two stories by writers Edna and Edward Anhalt , “ Quarantine ” and “ Some Like 'Em Cold ” . The gangster material , which ends up in firmly in thriller territory with an extended chase scene near the end of the **movie** , is probably the highlight . Not surprisingly , Kazan has said that he believes the villains are “ more colorful – I never had much affection for the good guys anyway . I do n't like puritans ” . A close second is the only material that approaches the “ panic ” of the title – the discovery of the plague and the **attempt** to track down the **unmasked** , inoculate them and contain the **ailment** . While there is plenty of suspense during these two “ **passions** ” , much of the film is also a **reasonably** straightforward drama , with pacing more **symptomatic** of that genre . The dialogue throughout is excellent . The stylistic **variance** to many modern films could hardly be more pronounced . It is intelligent , delivered **fast** and well enunciated by each character . Conflict is n't created by “ **idiotic** ” decisions but smart **move** ; events and characters ' actions are more like a chess game . When unusual stances are taken , such as Reed withholding the plague from the **journal** , he gives **comparatively** lengthy justifications for his decisions , which other characters argue over . In light of this , it 's **fascinating** that Kazan believed that “ **validity** , religion , **ethos** and the middle class are all murdering us ” . That idea works its way into the film through the alterations to the norm , or allowances away from it , made by the protagonists . For example , head gangster Blackie ( Jack Palance in his first film role ) is offered a “ Get Out of Jail Free ” card if he 'll cooperate with combating the plague . The technical **matters** of the film are **handsome** , if nothing exceptional , but the real reasons to watch are the performances , the intriguing **screenplay** and the well-written dialogue .

Correct label: positive.

Model confidence on original example: 89.9.

#### Data augmentation model, example 9

Original: i **completely** agree with jamrom4.. this was the single **most horrible** movie i have ever seen..  
**holy crap** it was terrible.. i was warned not to see it..and **foolishly** i **watched** it anyway.. about 10  
minutes **into** the **painful** experience i **completely** gave up on watching the atrocity..but sat through until  
the end..just to **see if** i could.. **well** i **did** and now i wish i had not..it was disgusting..nothing happened  
and the ending was **all** preachy..no **movie** that **bad** has the right to survive..i implore all of you to spare  
**yourself** the terror of **fatty drives** the bus..if only i **had** heeded the **same** warning..please save **yourself**  
from this movie..i have a feeling those who rated it **highly** were **involved** in the making of the movie..and  
**should all** be wiped off the face of the planet..

Perturbed: i **fully** agree with jamrom4.. this was the single **greatest horrifying** movie i have ever seen..  
**saintly shit** it was terrible.. i was warned not to see it..and **recklessly** i **saw** it anyway.. about 10 minutes  
**in** the **arduous** experience i **fully** gave up on watching the atrocity..but sat through until the end..just to  
**behold whether** i could.. **bah** i **got** and now i wish i had not..it was disgusting..nothing happened and the  
ending was **everybody** preachy..no **cinematic** that **wicked** has the right to survive..i implore all of you to  
spare **yourselves** the terror of **fat driving** the bus..if only i **has** heeded the **similar** warning..please save  
**himself** from this movie..i have a feeling those who rated it **supremely** were **embroiled** in the making  
of the movie..and **must everyone** be wiped off the face of the planet..

Correct label: negative.

Model confidence on original example: 99.4.

#### Data augmentation model, example 10

Original: jim carrey can do anything . i thought this was going to be some **dumb childish** movie , and  
it **TOTALLY** was not . it was so incredibly funny for EVERYONE , adults & kids . i **saw** it once cause  
it was almost out of theatres , and now it 's **FINALLY** coming out on DVD this tuesday and i 'm way to  
excited , as you can see . you should definitely see it if you have n't already , it was so **great** ! Liz

Perturbed: jim carrey can do anything . i thought this was going to be some **idiotic puerile** movie , and it  
**TOTALLY** was not . it was so incredibly funny for EVERYONE , adults & kids . i **noticed** it once cause  
it was almost out of theatres , and now it 's **FINALLY** coming out on DVD this tuesday and i 'm way to  
excited , as you can see . you should definitely see it if you have n't already , it was so **awesome** ! Liz

Correct label: positive.

Model confidence on original example: 83.3.
